# Supplementary material for: Phosphate Recovery Mechanism from Low P-Containing Wastewaters via CaP Crystallization Using Apatite as Seed: Seed Adsorption, Surface-Induced Crystallization, or Ion Clusters Aggregation?
Source: MDPI journal article supplement (doi:10.3390/separations11050138), 2024-04-30
Supplement: s1 [file s1]

## Supporting Information

**Table S1.** Dissolution kinetic parameters of pseudo-first-order dynamics model.

| P (mg/L) | $q_e$ (mg/g) | Pseudo-first-order dynamics |               |        |
|----------|--------------|-----------------------------|---------------|--------|
|          |              | $q_e$ (mg/g)                | $k_1$ (1/min) | $R^2$  |
| 0        | -39.7        | -61.6                       | -0.00088      | 0.7085 |
| 1        | -26.7        | -41.9                       | -0.00084      | 0.6889 |
| 5        | -23.5        | -36.4                       | -0.00021      | 0.5695 |
| 25       | -5.0         | -11.1                       | 0.00017       | 0.1051 |

**Table S2.** Dissolution kinetic parameters of pseudo-second-order dynamics model.

| P (mg/L) | $q_e$ (mg/g) | Pseudo-second-order dynamics |                    |        |
|----------|--------------|------------------------------|--------------------|--------|
|          |              | $q_e$ (mg/g)                 | $k_2$ (g/(mg·min)) | $R^2$  |
| 0        | -39.7        | -41.8                        | 0.0011             | 0.9994 |
| 1        | -26.7        | -27.9                        | 0.0018             | 0.9995 |
| 5        | -23.5        | -22.2                        | 0.0014             | 0.9951 |
| 25       | -5.0         | -11.5                        | -0.0867            | 0.0281 |

**Table S3.** Dissolution kinetic parameters of intra-particle diffusion model.

| P (mg/L) | $K_{p1}$ (mg/(g·min <sup>1/2</sup> )) | $C_1$ (mg/g) | $R_2$ | $K_{p2}$ (mg/(g·min <sup>1/2</sup> )) | $C_2$ (mg/g) | $R^2$ | $K_{p3}$ (mg/(g·min <sup>1/2</sup> )) | $C_3$ (mg/g) | $R_2$ |
|----------|---------------------------------------|--------------|-------|---------------------------------------|--------------|-------|---------------------------------------|--------------|-------|
| 0        | -0.1371                               | -            | --    | -0.0800                               | -            | 0.991 | 0.0242                                | -            | --    |
|          |                                       | 1.967        |       |                                       | 2.580        | 2     |                                       | 4.389        |       |
|          |                                       | 8            |       |                                       | 8            |       |                                       | 1            |       |
| 1        | -0.1153                               | -            | --    | -0.0425                               | -            | 0.968 | 0.0242                                | -            | --    |
|          |                                       | 1.136        |       |                                       | 1.919        | 3     |                                       | 3.089        |       |
|          |                                       | 7            |       |                                       | 0            |       |                                       | 1            |       |
| 5        | -0.1432                               | 0.219        | --    | -0.0305                               | -            | 0.950 | 0.0180                                | -            | --    |
|          |                                       | 2            |       |                                       | 1.513        | 4     |                                       | 2.832        |       |
|          |                                       |              |       |                                       | 8            |       |                                       | 8            |       |

**Table S4.** Parameters of dissolution isotherms at different temperatures.

| Temperature (K) | Langmuir model |              |        | Freundlich model                   |          |        |
|-----------------|----------------|--------------|--------|------------------------------------|----------|--------|
|                 | $q_m$ (mg/g)   | $K_L$ (L/mg) | $R^2$  | $K_F$ (mg/g(L/mg) <sup>1/n</sup> ) | 1/n      | $R^2$  |
| 283             | -0.7030        | -0.3666      | 0.8301 | -8.6614                            | -8.08236 | 0.9254 |
| 293             | -0.8831        | -0.3539      | 0.7975 | -9.2236                            | -0.7449  | 0.9237 |
| 303             | -1.0096        | -0.3564      | 0.8279 | -9.8188                            | -0.7594  | 0.9139 |

**Table S5.** Thermodynamic parameters of HAP dissolution at different temperatures.

| Temperature (K) | Ln $K_0$ | $\Delta G^0$ (kJ/mol) | $\Delta H^0$ (kJ/mol) | $\Delta S^0$ (J/(mol K)) |
|-----------------|----------|-----------------------|-----------------------|--------------------------|
| 283             | 0.313    | -0.74                 | -3.93                 | -11.30                   |
| 293             | 0.219    | -0.53                 |                       |                          |
| 303             | 0.203    | -0.51                 |                       |                          |

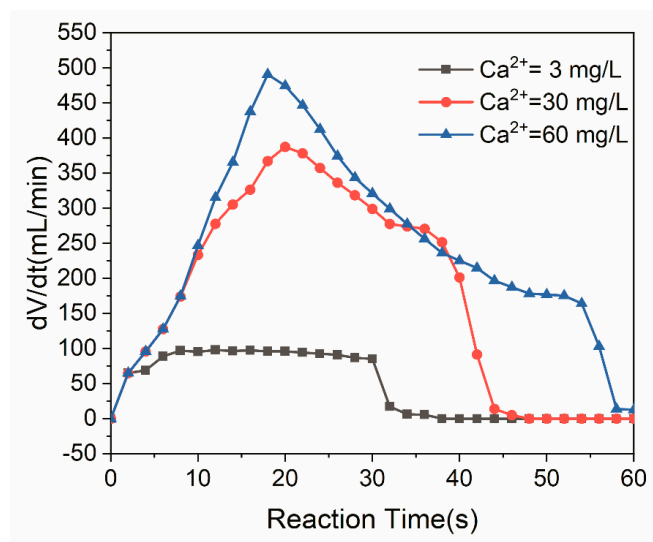

**Figure S1.** Effect of initial Ca concentration on alkali consumption rates during constant pH titration experiments.

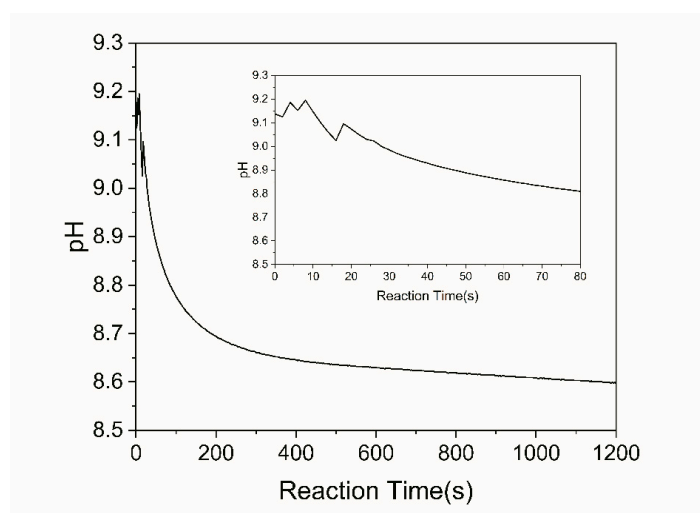

**Figure S2.** The change of pH during non-constant pH titration experiment.

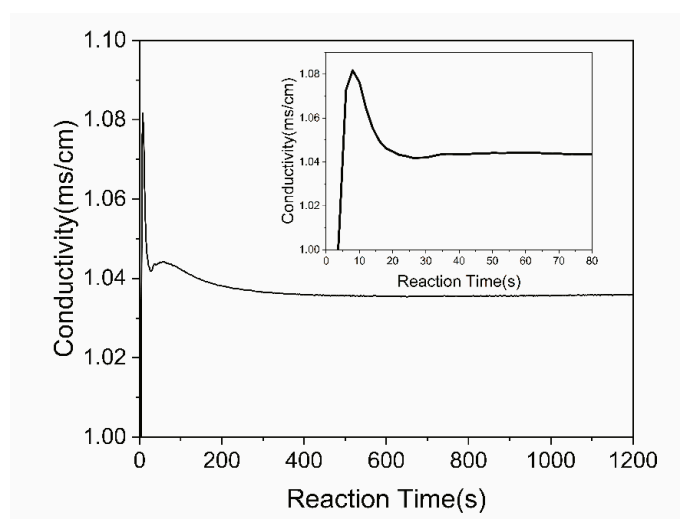

**Figure S3.** The change of electrical conductivity during non-constant pH titration experiment.

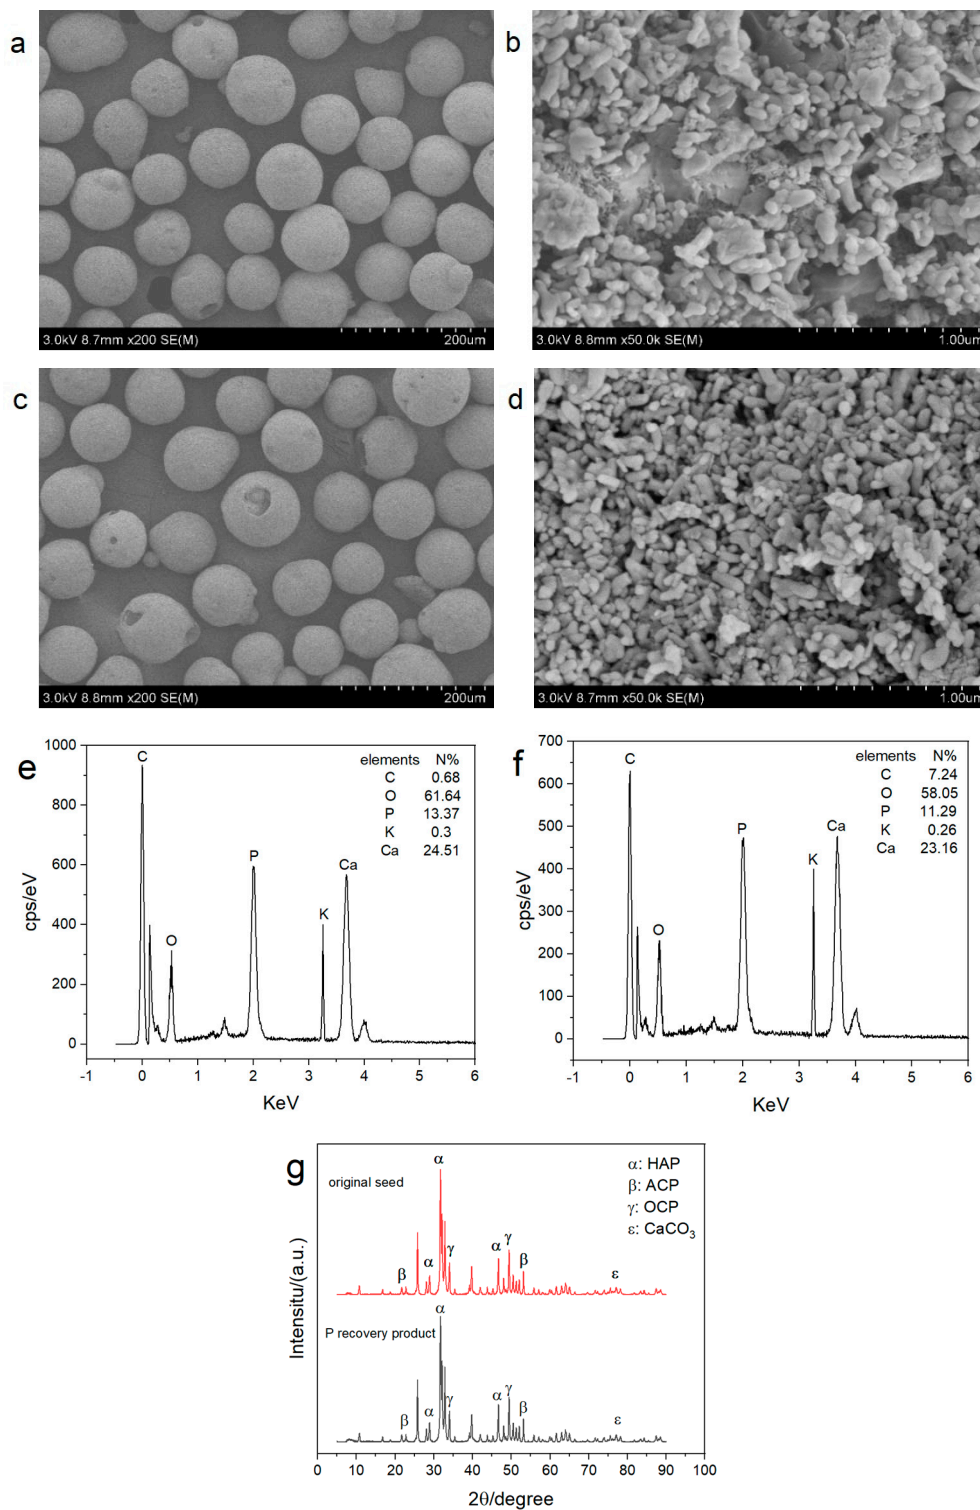

**Figure S4.** Characteristics of original seeds and P recovery products. (a) and (b) are SEM images of original seeds with magnification of  $\times 200$  and  $\times 50\,000$ , respectively. (c) and (d) are SEM images of P recovery products with magnification of  $\times 200$  and  $\times 50\,000$ , respectively. (e) and (f) are EDS spectra for C, O, P, K and Ca of original seeds and P recovery products, respectively. (g) is X-ray diffraction diagrams of original seeds and P recovery products. P recovery test conditions: initial P concentration of 1 mg/L, initial  $\text{Ca}^{2+}$  concentration of 30 mg/L, initial pH of 9.0, seed dosage of 2 g/L, and reaction time 30 min.
